# Supplementary material
Source: Springer Nature journal article supplement (https://www.springermedizin.de/resource/supplementary/13550_2013_169_MOESM2_ESM.pdf/9687740)

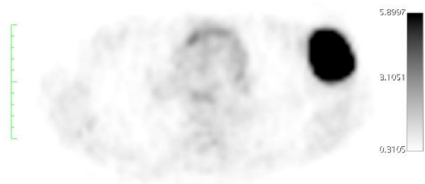

**A**

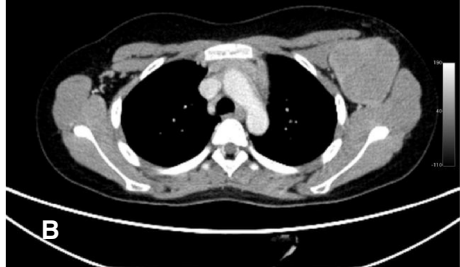

**B**

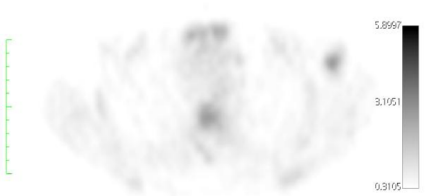

**C**

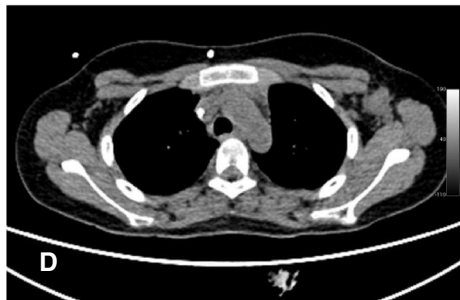

**D**

Supplement: MOESM2 [file 9687740]
